# Supplementary material for: Genomic Restructuring in the Tasmanian Devil Facial Tumour: Chromosome Painting and Gene Mapping Provide Clues to Evolution of a Transmissible Tumour
Source: PubMed Central journal article supplement (PMC3280961; doi:10.1371/journal.pgen.1002483), 2012-02-16

*Sh* ♀

Strain 3

Chromosome 4

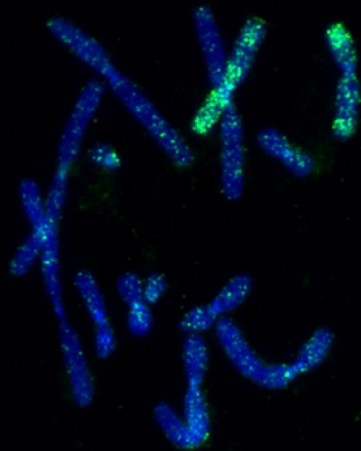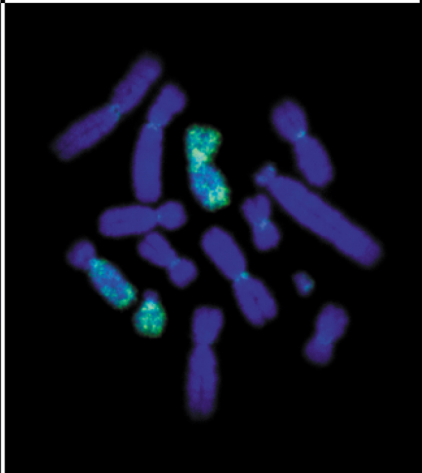

Chromosome 5

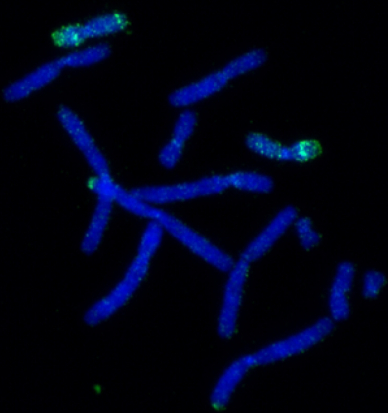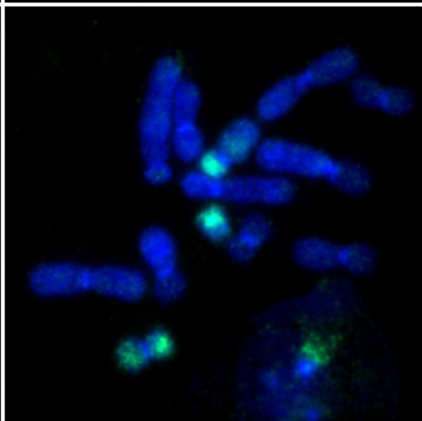

Supplement: pgen.1002483.s007.pdf [file pgen.1002483.s007.pdf]
